# Supplementary material for: Deconvolution of the X-ray absorption spectrum of trans-1,3-butadiene with resonant Auger spectroscopy
Source: Royal Society of Chemistry journal article supplement (doi:10.1039/d4cp00053f), 2024-01-01
Supplement: d4cp00053f1.pdf [file d4cp00053f1.pdf]

## Supplementary Information: Deconvolution of the X-ray Absorption Spectrum of *trans*-1,3-Butadiene with Resonant Auger Spectroscopy

David M. P. Holland<sup>a</sup>, Jiří Suchan<sup>b</sup>, Jiří Janošík<sup>c</sup>, Camila Bacellar<sup>d</sup>, Ludmila Leroy<sup>d</sup>, Thomas R. Barillot<sup>d</sup>, Luca Longetti<sup>d</sup>, Marcello Coreno<sup>e</sup>, Monica de Simone<sup>f</sup>, Cesare Grazioli<sup>f</sup>, Majed Chergui<sup>d,g</sup>, Eva Muchová<sup>c\*</sup> and Rebecca A. Ingle<sup>h\*</sup>

<sup>a</sup> STFC, Daresbury Laboratory, Daresbury, Warrington, Cheshire WA4 4AD, United Kingdom

<sup>b</sup> Institute for Advanced Computational Science, Stony Brook University, Stony Brook, New York 11794-5250, United States

<sup>c</sup> Department of Physical Chemistry, University of Chemistry and Technology, Technická 5, 166 28 Prague, Czech Republic

<sup>d</sup> Laboratoire de Spectroscopie Ultrarapide, Ecole Polytechnique Fédérale de Lausanne, ISIC, FSB, CH-1015 Lausanne, Switzerland

<sup>e</sup> ISM-CNR, Istituto di Struttura dei Materiali, LD2 Unit, 34149 Trieste, Italy

<sup>f</sup> IOM-CNR, Istituto Officina dei Materiali, 34149 Trieste, Italy

<sup>g</sup> Elettra-Sincrotrone Trieste S.C.p.A., S.S. 14 km 163,5 in Area Science Park, I-34012 Basovizza, Trieste, Italy

<sup>h</sup> Department of Chemistry, 20 Gordon Street, London, WC1H 0AJ, United Kingdom

E-mail: eva.muchova@vscht.cz, r.ingle@ucl.ac.uk

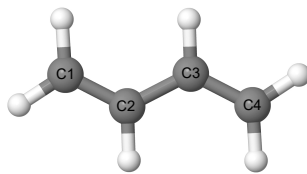

**Figure S1** Structure of *trans*-butadiene with numbering of carbon atoms. Carbon atoms 1 and 4 are labeled as “edge”, carbons 2 and 3 are labeled as “central”.

**Table S1** Optimised geometry in Cartesian coordinates of *trans*-butadiene at the MP2/aug-cc-pVTZ level (no symmetry applied).

|   | x         | y         | z         |
|---|-----------|-----------|-----------|
| C | -1.523073 | -0.494314 | -0.093437 |
| C | -0.721914 | 0.557579  | 0.123550  |
| C | 0.721913  | 0.557579  | -0.123551 |
| C | 1.523074  | -0.494314 | 0.093436  |
| H | -1.133243 | -1.413535 | -0.511288 |
| H | 2.579623  | -0.447045 | -0.128570 |
| H | 1.133246  | -1.413536 | 0.511288  |
| H | 1.158198  | 1.480994  | -0.489070 |
| H | -2.579620 | -0.447049 | 0.128579  |
| H | -1.158197 | 1.480992  | 0.489076  |

**Table S2** Seven lowest energy vertical binding energies in eV of butadiene calculated at the CVS-EOM-IP-CCSD/cc-pVTZ and cc-pCVTZ level compared to experimental values<sup>1</sup> and theoretical values at the ADC(3)/aug-ANO level<sup>2</sup> with the ADC(3) spectroscopic factors given in parentheses.

| State            | Experiment <sup>1</sup> | EOM-IP-CCSD/cc-pVTZ + cc-pCVTZ | ADC(3)/aug-ANO <sup>2</sup>      |
|------------------|-------------------------|--------------------------------|----------------------------------|
| $\tilde{X}^2B_g$ | 9.29                    | 9.127                          | 8.988 (0.833)                    |
| $\tilde{A}^2A_u$ | 11.48                   | 11.808                         | 11.402 (0.613)<br>13.064 (0.290) |
| $\tilde{B}^2A_g$ | 12.2                    | 12.482                         | 12.481(0.890)                    |
| $\tilde{C}^2B_u$ | 13.49                   | 13.750                         | 13.688 (0.858)                   |
| $\tilde{D}^2A_g$ | 13.90                   | 13.807                         | 13.972 (0.885)                   |
| $\tilde{E}^2A_g$ | 15.3                    | 15.792                         | 15.709 (0.769)                   |
| $\tilde{F}^2B_u$ | 15.8                    | 15.986                         | 16.065 (0.616)<br>15.739 (0.198) |

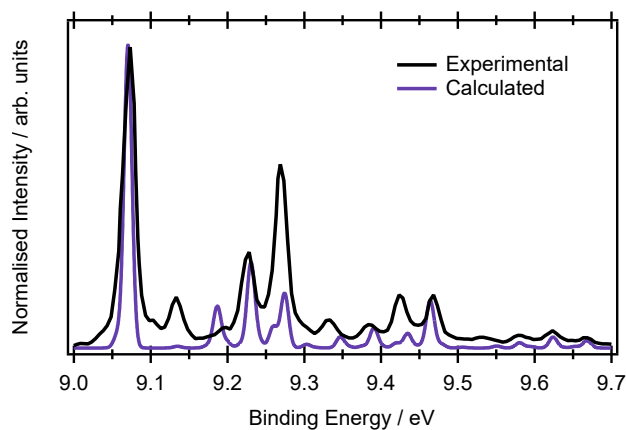

**Figure S2** Vibrationally resolved spectrum of the first ionised state  $\tilde{X}^2B_g$  of butadiene compared to the spectrum calculated at the MOM/B3LYP/cc-pVTZ + cc-pCVTZ level. The assignments are provided in the Table S3. The experimental data are taken from Ref 1.

**Table S3** Relative intensities and excitation energies (with respect to the adiabatic energy), and assignments of the photoelectron lines associated with the valence ionised  $\tilde{X}^2B_g$  ionic state of butadiene. Only values for relative intensities higher than 0.0055 are given. Relative intensities are calculated as  $I \approx I^{calc} = \langle \xi' | \xi'' \rangle^2 e^{-E''/kT}$ ,  $T = 300$  K. hb stands for hot band.

| Valence-ionised state |                |                       |
|-----------------------|----------------|-----------------------|
| Energy / eV           | Rel. Intensity | Assignment            |
| 0.0000                | 0.4120         | 0-0                   |
| 0.0023                | 0.1807         | $\nu_1$ hb            |
| 0.1162                | 0.0559         | $\nu_6$               |
| 0.1185                | 0.0245         | $\nu_1 + \nu_6$ hb    |
| 0.1285                | 0.0086         | $2\nu_4$              |
| 0.1598                | 0.0945         | $\nu_{12}$            |
| 0.1607                | 0.0208         | $\nu_{13}$            |
| 0.1621                | 0.0415         | $\nu_1 + \nu_{12}$ hb |
| 0.1914                | 0.0108         | $\nu_1 + \nu_{17}$ hb |
| 0.2037                | 0.0750         | $\nu_{18}$            |
| 0.2060                | 0.0329         | $\nu_1 + \nu_{18}$ hb |
| 0.2760                | 0.0128         | $\nu_6 + \nu_{12}$    |
| 0.3196                | 0.0132         | $2\nu_{12}$           |
| 0.3199                | 0.0102         | $\nu_6 + \nu_{18}$    |
| 0.3635                | 0.0172         | $\nu_{12} + \nu_{18}$ |
| 0.3928                | 0.0314         | $\nu_{20}$            |
| 0.3940                | 0.0274         | $\nu_{22}$            |
| 0.3950                | 0.0138         | $\nu_1 + \nu_{20}$ hb |
| 0.3962                | 0.0120         | $\nu_1 + \nu_{22}$ hb |
| 0.4074                | 0.0055         | $2\nu_{18}$           |
| 0.5526                | 0.0072         | $\nu_{12} + \nu_{20}$ |
| 0.5538                | 0.0063         | $\nu_{12} + \nu_{22}$ |

**Table S4** Bond lengths in Å of optimised core-excited (XAS), core-ionised (XPS) and valence-ionised states of butadiene calculated at various levels of theory. \*Ref 3.

|                         | C1-C2 / Å | C2-C3 Å                  | C3-C4 Å |
|-------------------------|-----------|--------------------------|---------|
|                         |           | MOM/B3LYP/cc-pCVTZ       |         |
| ground electronic state | 1.334     | 1.453                    | 1.334   |
| XAS edge C              | 1.355     | 1.382                    | 1.361   |
| XAS central C           | 1.361     | 1.393                    | 1.361   |
| XPS edge C              | 1.298     | 1.425                    | 1.328   |
| XPS central C           | 1.307     | 1.399                    | 1.307   |
| valence-ionised state   | 1.382     | 1.404                    | 1.382   |
|                         |           | MP2/aug-cc-pVTZ          |         |
| ground electronic state | 1.341     | 1.452                    | 1.341   |
|                         |           | MP2/cc-pVTZ and cc-pCVTZ |         |
| ground electronic state | 1.337     | 1.450                    | 1.337   |
|                         |           | experiment*              |         |
| ground electronic state | 1.338     | 1.454                    | 1.338   |

**Table S5** Vibrational frequencies in  $\text{cm}^{-1}$  for optimised core-excited (XAS), core-ionised (XPS) and valence-ionised states of butadiene.

| vibration                            | ground state | valence ionised | XPS – edge C | XPS – cent C | XAS – edge C | XAS – cent C |
|--------------------------------------|--------------|-----------------|--------------|--------------|--------------|--------------|
| $\nu_1$ C-C torsion                  | 171          | 190             | 84           | 164          | x            | 219          |
| $\nu_2$ CCC deform                   | 295          | 298             | 311          | 336          | x            | 296          |
| $\nu_3$ CCC deform                   | 517          | 519             | 569          | 570          | 749          | 547          |
| $\nu_4$ CCH <sub>2</sub> twist       | 538          | 434             | 538          | 549          | 143          | 446          |
| $\nu_5$ CH <sub>2</sub> twist        | 784          | 518             | 845          | 804          | 757          | 598          |
| $\nu_6$ CH <sub>2</sub> rock         | 898          | 937             | 958          | 969          | 852          | 955          |
| $\nu_7$ CH <sub>2</sub> wagging      | 941          | 1062            | 1078         | 1084         | 429          | 514          |
| $\nu_8$ CH <sub>2</sub> wagging      | 941          | 1055            | 1086         | 1079         | 540          | 545          |
| $\nu_9$ CH op bend                   | 1001         | 921             | 984          | 992          | 819          | 883          |
| $\nu_{10}$ CH <sub>2</sub> rock      | 1004         | 1011            | 1136         | 1079         | 1133         | 1031         |
| $\nu_{11}$ CH op bend                | 1054         | 1019            | 1036         | 1053         | 853          | 955          |
| $\nu_{12}$ C-C stretch               | 1229         | 1289            | 1258         | 1336         | 1307         | 1302         |
| $\nu_{13}$ CH ip bend                | 1317         | 1296            | 1336         | 1394         | 1338         | 1318         |
| $\nu_{14}$ CH ip bend                | 1323         | 1273            | 1419         | 1410         | 1243         | 1293         |
| $\nu_{15}$ CH <sub>2</sub> scissor   | 1417         | 1373            | 1466         | 1464         | 1366         | 1411         |
| $\nu_{16}$ CH <sub>2</sub> scissor   | 1476         | 1503            | 1578         | 1523         | 1498         | 1550         |
| $\nu_{17}$ C=C stretch               | 1652         | 1525            | 1803         | 1726         | 1609         | 1600         |
| $\nu_{18}$ C=C stretch               | 1703         | 1643            | 1699         | 1804         | 1746         | 1708         |
| $\nu_{19}$ CH stretch                | 3123         | 3168            | 3197         | 3383         | 2973         | 3132         |
| $\nu_{20}$ CH <sub>2</sub> s-stretch | 3133         | 3142            | 2962         | 3156         | 3138         | 3386         |
| $\nu_{21}$ CH <sub>2</sub> s-stretch | 3135         | 3144            | 3157         | 3156         | 3459         | 3420         |
| $\nu_{22}$ CH stretch                | 3136         | 3178            | 3683         | 3387         | 3072         | 3142         |
| $\nu_{23}$ CH <sub>2</sub> a-stretch | 3219         | 3249            | 3069         | 3261         | 3623         | 3532         |
| $\nu_{24}$ CH <sub>2</sub> a-stretch | 3220         | 3249            | 3255         | 3261         | 3506         | 3531         |

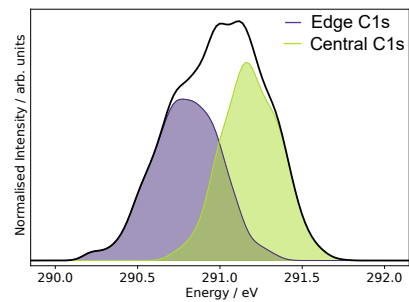

**Figure S3** X-ray core-ionised spectra calculated within NEA at CVS-EOM-EE-CCSD/cc-pVTZ + cc-pCVZ level for an ensemble of 400 geometries with each line being Gaussian broadened by phenomenological 0.05 eV. The intensities were estimated as the squares of the respective Dyson orbitals.

**Table S6** Relative intensities and excitation energies (with respect to the adiabatic energy), and assignments of the photoelectron lines associated with the core-ionised states of butadiene. Only values for relative intensities higher than 0.01 are given. Relative intensities are calculated as  $I_{\circ} I^{calc} = \langle \xi' | \xi'' \rangle^2 e^{-E''/kT}$ ,  $T = 300$  K.

| XPS edge C    |                |                            |
|---------------|----------------|----------------------------|
| Energy / eV   | Rel. Intensity | Assignment                 |
| -0.0109       | 0.1143         | $\nu_1$ hb                 |
| 0.0000        | 0.2951         | 0-0                        |
| 0.0098        | 0.0204         | $3\nu_1$ hb                |
| 0.0207        | 0.0175         | $2\nu_1$                   |
| 0.0276        | 0.0358         | $\nu_1 + \nu_2$ hb         |
| 0.0385        | 0.0924         | $\nu_2$                    |
| 0.0705        | 0.0252         | $\nu_3$                    |
| 0.0771        | 0.0170         | $2\nu_1$                   |
| 0.1079        | 0.0209         | $\nu_1 + \nu_6$ hb         |
| 0.1188        | 0.0541         | $\nu_6$                    |
| 0.1300        | 0.0169         | $\nu_1 + \nu_{10}$ hb      |
| 0.1409        | 0.0437         | $\nu_{10}$                 |
| 0.1574        | 0.0169         | $\nu_1 + \nu_6$            |
| 0.1759        | 0.0250         | $\nu_{14}$                 |
| 0.1794        | 0.0137         | $\nu_2 + \nu_{10}$         |
| 0.1848        | 0.0114         | $\nu_1 + \nu_{16}$ hb      |
| 0.1957        | 0.0293         | $\nu_{16}$                 |
| 0.4457        | 0.0132         | $\nu_1 + \nu_{22}$ hb      |
| 0.4566        | 0.0340         | $\nu_{22}$                 |
| 0.4952        | 0.0107         | $\nu_2 + \nu_{22}$         |
| XPS central C |                |                            |
| Energy / eV   | Rel. Intensity | Assignment                 |
| -0.0009       | 0.1337         | $\nu_1$ hb                 |
| 0.0000        | 0.3042         | 0-0                        |
| 0.0698        | 0.0349         | $\nu_1 + \nu_3$ hb         |
| 0.0707        | 0.0794         | $\nu_3$                    |
| 0.1193        | 0.0741         | $\nu_1 + \nu_6$ hb         |
| 0.1202        | 0.1685         | $\nu_6$                    |
| 0.1414        | 0.0146         | $2\nu_3$                   |
| 0.1647        | 0.0176         | $\nu_1 + \nu_{12}$ hb      |
| 0.1656        | 0.0401         | $\nu_{12}$                 |
| 0.1728        | 0.0201         | $\nu_{13}$                 |
| 0.1900        | 0.0193         | $\nu_1 + \nu_3 + \nu_6$ hb |
| 0.1909        | 0.0440         | $\nu_3 + \nu_6$            |
| 0.2236        | 0.0102         | $\nu_{18}$                 |
| 0.2363        | 0.0104         | $\nu_3 + \nu_{12}$         |
| 0.2394        | 0.0234         | $\nu_1 + 2\nu_6$ hb        |
| 0.2403        | 0.0533         | $2\nu_6$                   |
| 0.2858        | 0.0222         | $\nu_6 + \nu_{12}$         |
| 0.2930        | 0.0112         | $\nu_1 + \nu_{13}$         |
| 0.3110        | 0.0139         | $\nu_3 + 2\nu_6$           |
| 0.3605        | 0.0125         | $3\nu_6$                   |
| 0.4185        | 0.0107         | $\nu_1 + \nu_{19}$         |
| 0.4194        | 0.0243         | $\nu_{19}$                 |
| 0.5396        | 0.0135         | $\nu_6 + \nu_{19}$         |

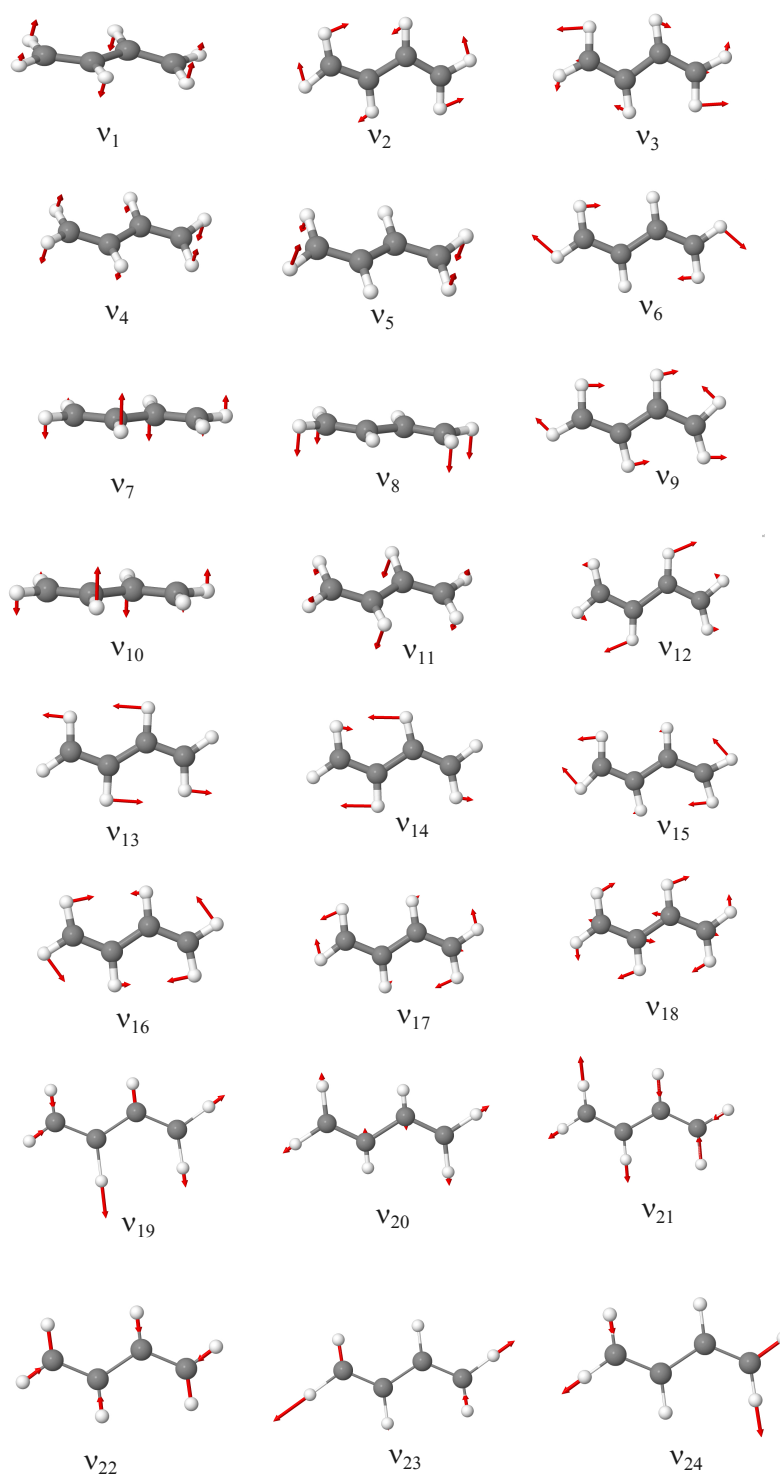

**Figure S4** Sketch of vibrational modes 1-24 of butadiene.

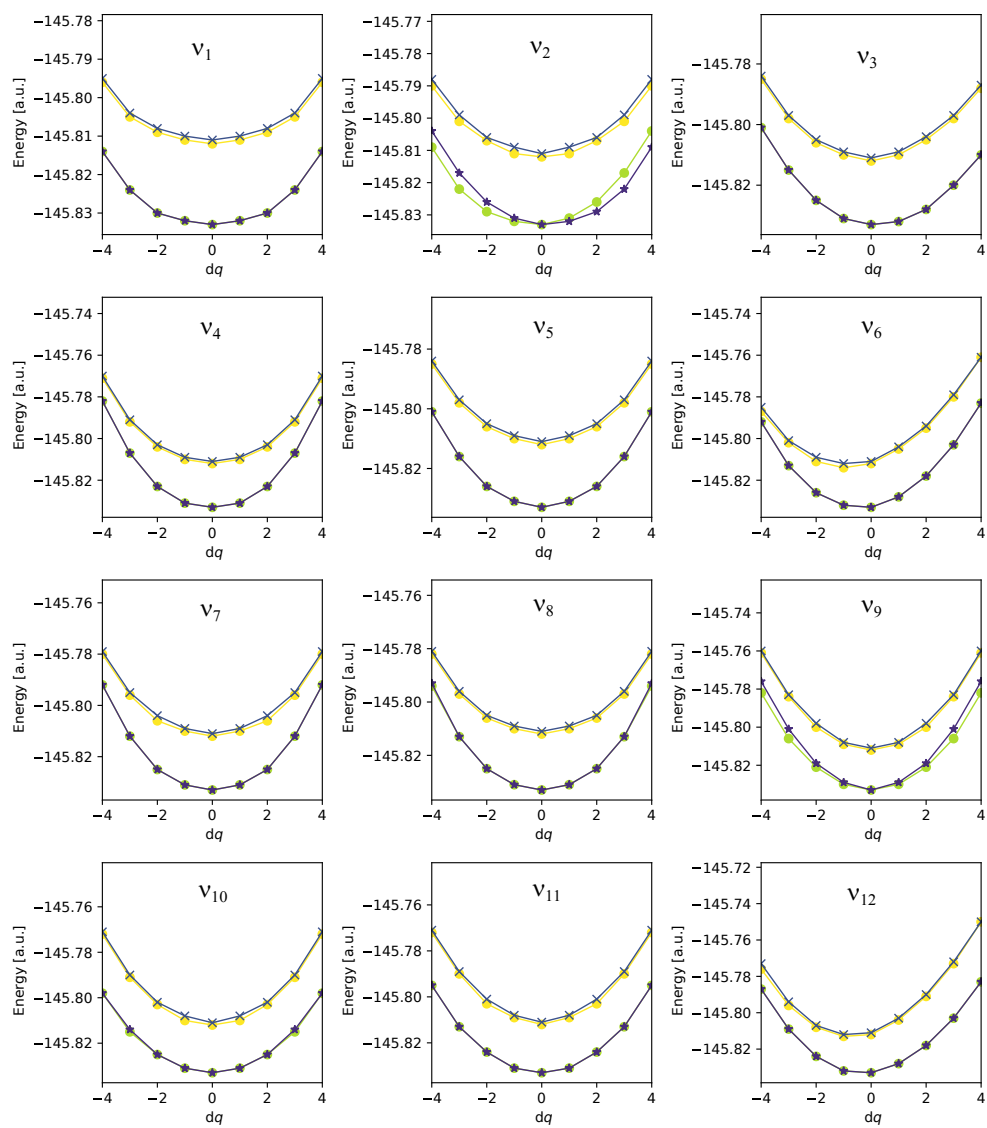

**Figure S5** Energy profiles calculated at the SRC1-r1/cc-pVTZ and cc-CVTZ level for the four lowest core-excited states of butadiene along vibrational modes 1-12.



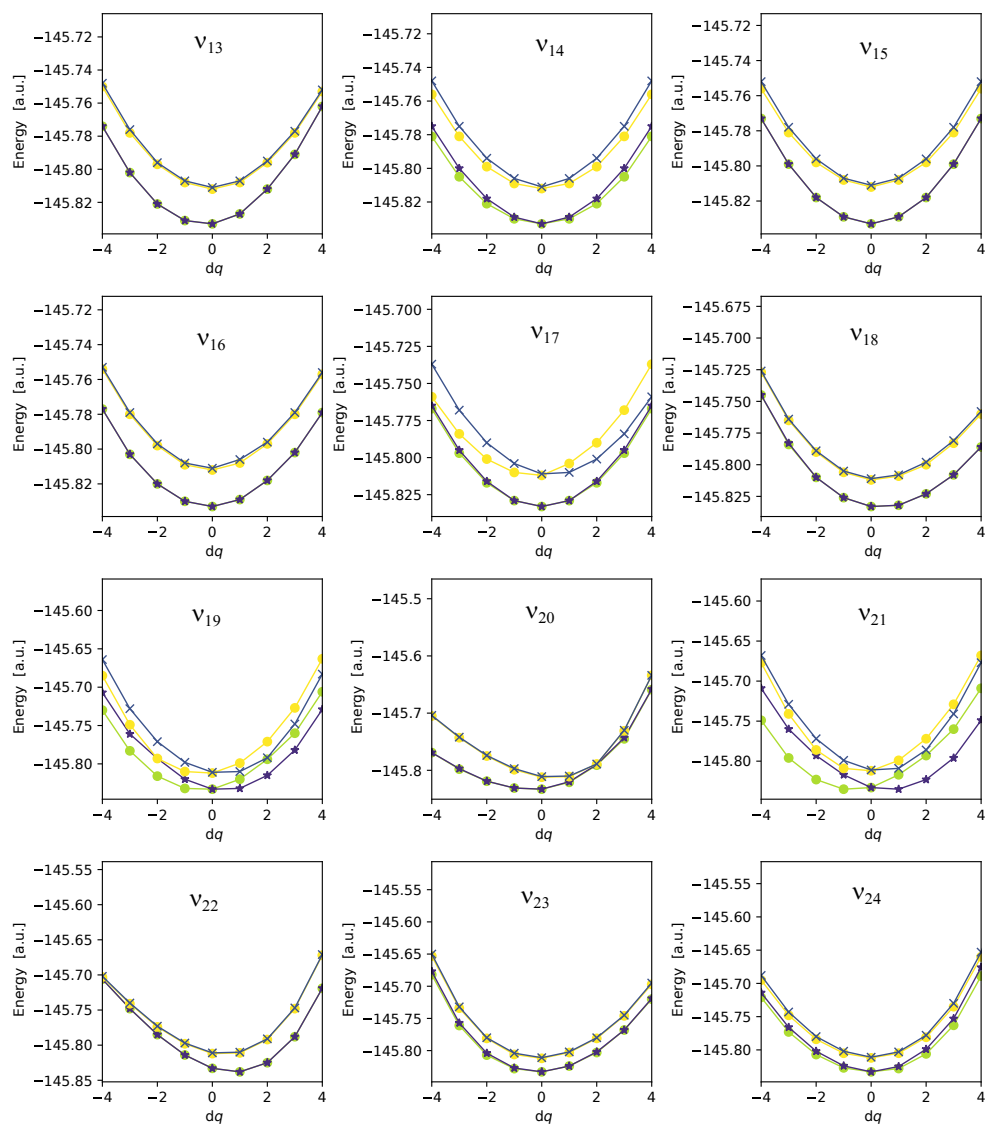

**Figure S6** Energy profiles calculated at the SRC1-r1/cc-pVTZ and cc-CVTZ level for the four lowest core-excited states of butadiene along vibrational modes 13-24.

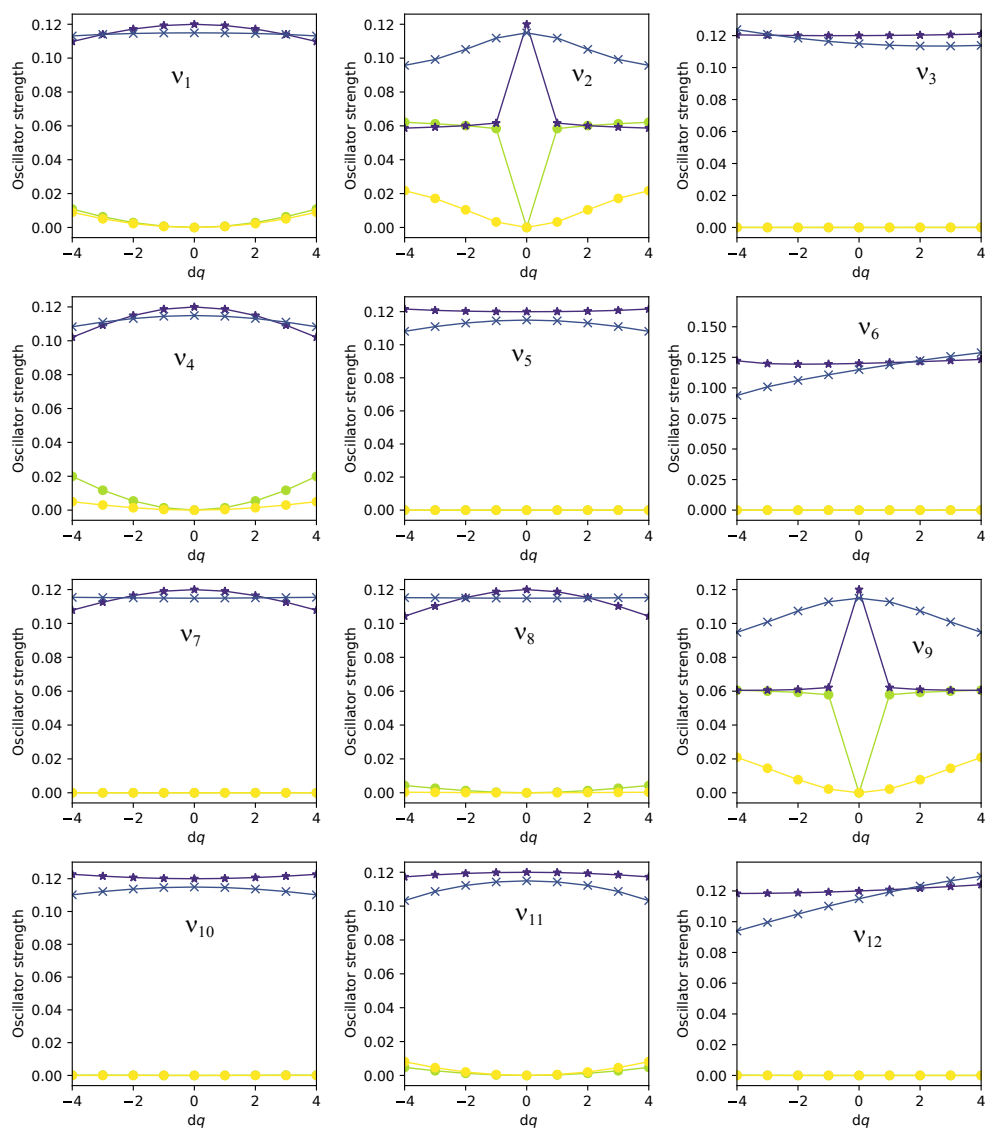

Figure S7 Oscillator strengths along vibrational coordinates 1-12 calculated at the SRC1-r1/cc-pVTZ and cc-CVTZ level.

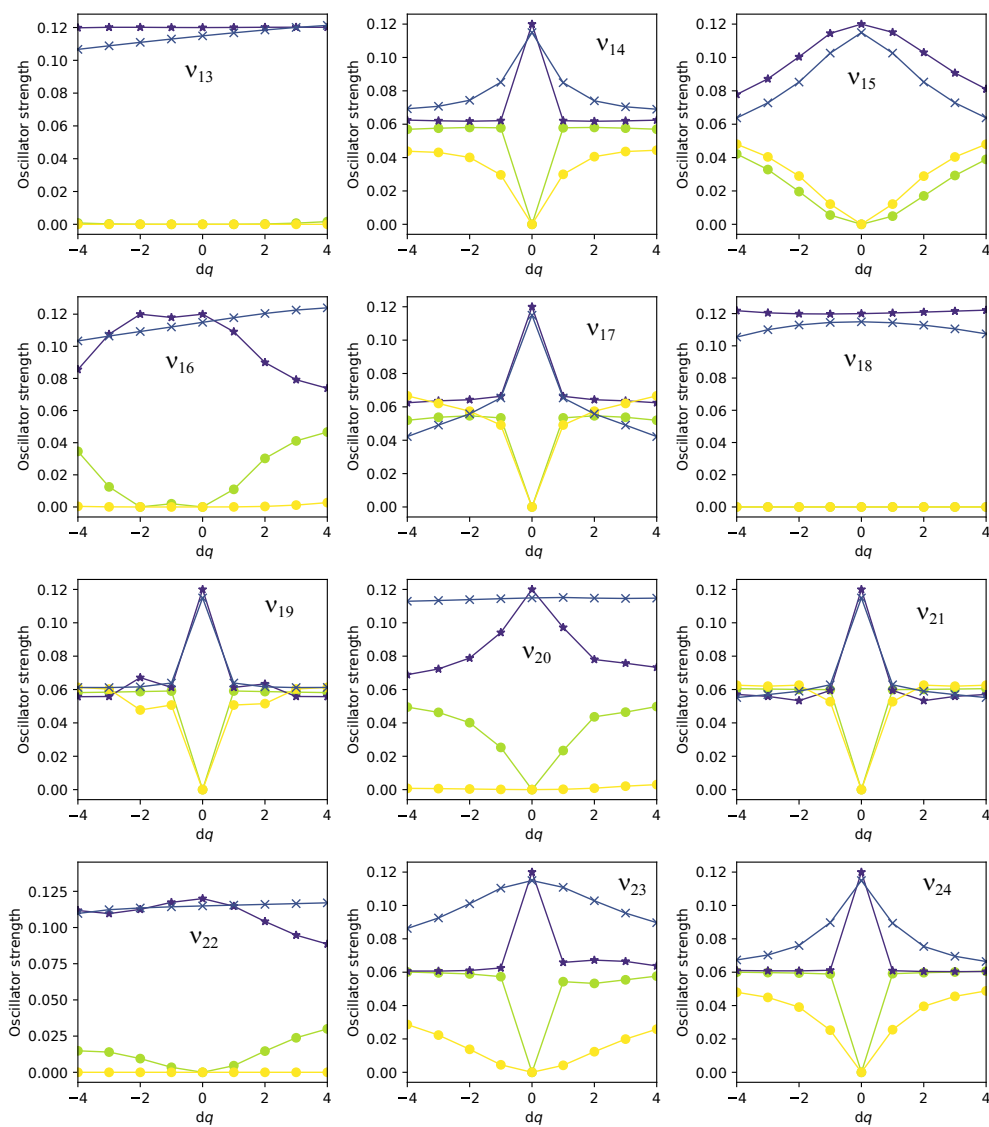

**Figure S8** Oscillator strengths along vibrational coordinates 13-24 calculated at the SRC1-r1/cc-pVTZ and cc-CVTZ level.

**Table S7** Relative intensities and excitation energies (with respect to the adiabatic energy), and assignments of the X-ray absorption spectral lines associated with the core-excited states of butadiene. Only values for relative intensities higher than 0.01 are given. Relative intensities are calculated as  $I_{\circ}^{calc} = \langle \xi' | \xi'' \rangle^2 e^{-E''/kT}$ ,  $T = 300$  K.

| XAS edge C    |                |                       |
|---------------|----------------|-----------------------|
| Energy / eV   | Rel. Intensity | Assignment            |
| -0.0188       | 0.0408         | $\nu_1$ hb            |
| 0.0000        | 0.1352         | 0-0                   |
| 0.0178        | 0.0190         | $\nu_1$               |
| 0.0482        | 0.0154         | $\nu_1 + \nu_2$ hb    |
| 0.0670        | 0.0511         | $2\nu_2$              |
| 0.1056        | 0.0108         | $\nu_{10}$            |
| 0.1057        | 0.0095         | $\nu_5$               |
| 0.1064        | 0.0091         | $2\nu_7$              |
| 0.1340        | 0.0108         | $2\nu_2$              |
| 0.1541        | 0.0166         | $\nu_{12}$            |
| 0.1621        | 0.0163         | $\nu_{11}$            |
| 0.1659        | 0.0146         | $\nu_{14}$            |
| 0.4101        | 0.0058         | $\nu_1 + \nu_{21}$ hb |
| 0.4289        | 0.0194         | $\nu_{21}$            |
| 0.4959        | 0.0073         | $\nu_2 + \nu_{21}$    |
| XAS central C |                |                       |
| Energy / eV   | Rel. Intensity | Assignment            |
| 0.0000        | 0.3928         | 0-0                   |
| 0.0678        | 0.0073         | $\nu_2$               |
| 0.1106        | 0.0017         | $2\nu_3$              |
| 0.1184        | 0.0309         | $\nu_5$               |
| 0.1274        | 0.0169         | $2\nu_6$              |
| 0.1352        | 0.0137         | $2\nu_7$              |
| 0.1614        | 0.0270         | $\nu_{11}$            |
| 0.1922        | 0.0190         | $\nu_{15}$            |
| 0.2117        | 0.1217         | $\nu_{17}$            |
| 0.3301        | 0.0096         | $\nu_5 + \nu_{17}$    |
| 0.4234        | 0.0190         | $2\nu_{17}$           |
| 0.4240        | 0.1019         | $\nu_{20}$            |
| 0.6357        | 0.0316         | $\nu_{17} + \nu_{20}$ |

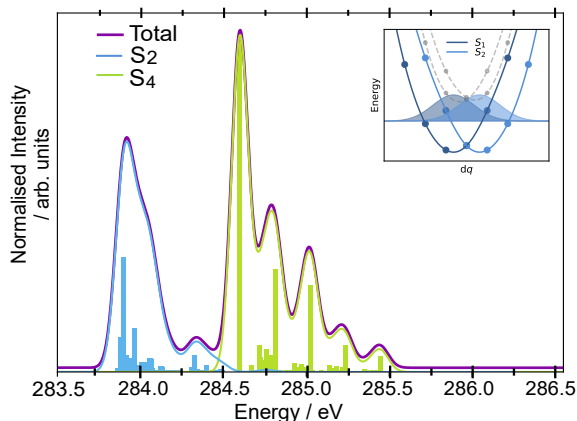

**Figure S9** Theoretical core X-ray absorption vibronic spectrum calculated at the MOM/B3LYP/cc-pVTZ + cc-pCVTZ level with a double harmonic approximation. The peaks were broadened by a phenomenological 0.05 eV. The 0-0 transition for the  $S_2$  state was shifted to 283.9 eV, and the 0-0 transition for the  $S_4$  state was shifted to 285.6 eV to match the experimental spectrum. Inset is a schematic of the lowest vibrational energy level of  $S_1$  and  $S_2$  in the harmonic approximation ( $S_1$  is equal to  $S_2$ ) for mode  $\nu_{21}$  to show the harmonic approximation (yielding diabatic states).

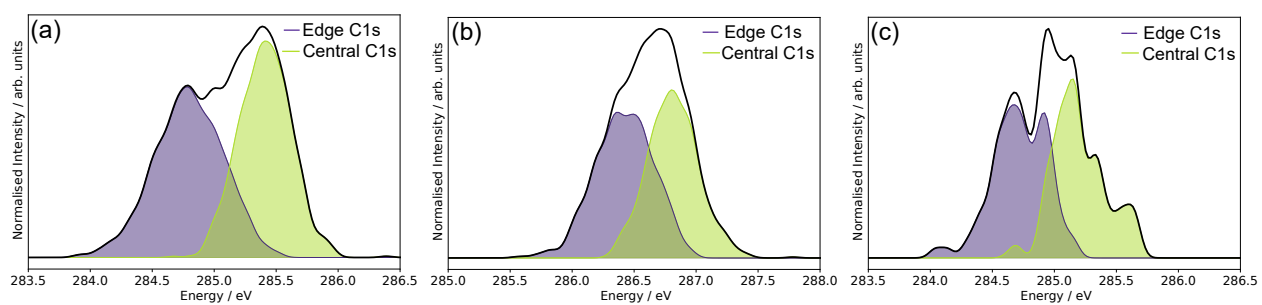

**Figure S10** X-ray absorption spectra calculated within NEA at TDDFT/SRC1-r1/cc-pVTZ (a), CVS-EOM-EE-CCSD/cc-pVDZ + cc-pCDZ (b) levels for an ensemble of 400 geometries and CVS-EOM-EE-CCSD/cc-pVTZ + cc-pCVZ (c) level for an ensemble of 50 geometries.

## 1 Details on theoretical methods for XAS spectra modelling

The Auger spectra are complex because they involve both core-excited (or core-ionised) and valence ionised states. All of these states can contain vibrational structure which may be convoluted in the Auger signal. Theoretical methods are typically tailored specifically for either the core or the valence region, but in our case a common approach is beneficial and we opt for a compromise. To model the vibrationally resolved spectra, the Maximum Overlap Method (MOM) was used with the B3LYP functional and the cc-pVTZ basis sets on the hydrogen atoms and the cc-pCVTZ basis sets on the carbon atoms (hereafter referred to as cc-pVTZ + cc-pCVTZ). The B3LYP functional was selected because of its accurate performance in combination with  $\Delta$ SCF methods.<sup>4,5</sup> The MOM method is in principle a ground state method and allows both gradients and Hessians to be estimated analytically, and it provides results for vibrationally resolved core-excited, core-ionised and valence ionised spectra that are directly comparable. We are aware that the absolute errors provided by the MOM/B3LYP method for energies of core-excited or core-ionised states are on the order of several eVs, but the relative positions of peaks, gradients and Hessians are comparable to those obtained by more accurate methods.

### Beyond harmonic approximation

To model the core-excited absorption spectra beyond the harmonic approximations, we adapted our own approach. The potential energy surfaces of the ground and first four core-excited states were calculated along the ground-state normal modes  $q_i$ , see Figures S5 and S6. The global potential energy surface of the  $j$ -th electronic state was assumed in the following form:

$$E^j(q_1, \dots, q_{24}) = E_0^j + \sum_{i=1}^{24} E_i^j(q_i) \quad (1)$$

where  $E_0^j$  is the electronic energy of the  $j$ -th state at the ground-state minimum geometry and  $E_i^j(q_i)$  captures its dependence on the normal mode  $q_i$ . The total Hamiltonian of the  $j$ -th electronic states then appears as

$$\hat{H} = - \sum_{i=1}^{24} \frac{\hbar^2}{2\mu_i} \frac{\partial^2}{\partial q_i^2} + E_0^j + \sum_{i=1}^{24} E_i^j(q_i) = E_0^j + \sum_{i=1}^{24} [\hat{T}_i + E_i^j(q_i)] = E_0^j + \sum_{i=1}^{24} \hat{H}_i^j(q_i) \quad (2)$$

and leads to a series of one-dimensional Schrödinger equations for each normal mode

$$\hat{H}_i^j(q_i) \chi_{i,n}^j(q_i) = \epsilon_{i,n}^j \chi_{i,n}^j(q_i) \quad (3)$$

These one-dimensional Schrödinger equations were solved with imaginary time ( $\tau$ ) propagation using the split operator method

$$\chi_{i,0}^j(\tau) = \exp\left(-\frac{\hat{H}_i^j \tau}{\hbar}\right) \chi_{\text{trial}} \quad (4)$$

The wave function was normalised at every step. To obtain higher eigenstates  $\chi_{i,n>0}^j$ , the lower eigenfunctions were projected out of the trial function. The overlaps between the initial and final vibrational states were integrated numerically. For all the calculations, we wrote our own Fortran and Python codes.

Table S8 Double ionisation potential (DIP) energies in eV for butadiene for the minimum energy optimised structure of butadiene at the EOM-DIP-CCSD/cc-pVTZ + cc-pCVTZ level. Molecular orbitals dominantly involved in the doubly ionised states are listed. The ground state valence shell electronic configuration of butadiene is given as  $(3a_g)^2(3b_u)^2(4a_g)^2(4b_u)^2(5b_u)^2(5a_g)^2(6a_g)^2(6b_u)^2(7a_g)^2(1a_u)^2(1b_g)^2$ .

| Singlet states     |             | Triplet states     |             |
|--------------------|-------------|--------------------|-------------|
| Orbitals           | Energy / eV | Orbitals           | Energy / eV |
| $(1b_g 1b_g)^{-2}$ | 25.37       | $(1a_u 1b_g)^{-2}$ | 26.88       |
| $(7a_g 1b_g)^{-2}$ | 28.40       | $(7a_g 1b_g)^{-2}$ | 28.26       |
| $(6b_u 1b_g)^{-2}$ | 29.33       | $(6b_u 1b_g)^{-2}$ | 29.18       |
| $(6a_g 1b_g)^{-2}$ | 30.15       | $(6a_g 1b_g)^{-2}$ | 29.88       |
| $(1a_u 1b_g)^{-2}$ | 30.23       | $(5b_u 1b_g)^{-2}$ | 31.21       |
| $(5b_u 1b_g)^{-2}$ | 31.26       | $(5a_g 1b_g)^{-2}$ | 31.39       |
| $(5a_g 1b_g)^{-2}$ | 31.47       | $(7a_g 1a_u)^{-2}$ | 31.92       |
| $(7a_g 7a_g)^{-2}$ | 31.74       | $(6b_u 7a_g)^{-2}$ | 31.99       |
| $(1a_u 1a_u)^{-2}$ | 32.36       | $(6a_g 7a_g)^{-2}$ | 33.06       |
| $(7a_g 1a_g)^{-2}$ | 32.48       | $6b_u 1a_u)^{-2}$  | 33.14       |
| $(6a_g 7a_g)^{-2}$ | 33.36       | $(6a_g 6b_u)^{-2}$ | 33.73       |
| $(6b_u 1a_u)^{-2}$ | 33.76       | $(4b_u 1b_g)^{-2}$ | 33.88       |
| $(6a_g 6b_u)^{-2}$ | 33.80       | $(6a_g 1a_u)^{-2}$ | 34.04       |
| $(4b_u 1b_g)^{-2}$ | 33.89       | $(5a_g 7a_g)^{-2}$ | 34.84       |
| $(6b_u 7a_g)^{-2}$ | 34.10       | $(5b_u 1a_u)^{-2}$ | 35.03       |
| $(6b_u 6b_u)^{-2}$ | 34.43       | $(5a_g 6b_u)^{-2}$ | 35.59       |
| $(6a_g 1a_u)^{-2}$ | 34.95       | $(5b_u 6a_g)^{-2}$ | 35.66       |
| $(6a_g 6a_g)^{-2}$ | 35.04       | $(5a_g 1a_g)^{-2}$ | 35.79       |
| $(5b_u 1a_u)^{-2}$ | 35.29       | $(5b_u 7a_g)^{-2}$ | 36.04       |
| $(5a_g 6a_g)^{-2}$ | 36.49       | $(5a_g 6a_g)^{-2}$ | 36.06       |
| $(5a_g 1a_u)^{-2}$ | 36.74       | $(4a_g 1b_g)^{-2}$ | 36.23       |
| $(5b_u 7a_g)^{-2}$ | 36.78       | $(5a_g 6a_g)^{-2}$ | 37.60       |
| $(5a_g 7a_g)^{-2}$ | 36.95       | $(4b_u 7a_g)^{-2}$ | 37.82       |
| $(4a_g 1b_g)^{-2}$ | 37.16       | $(4b_u 1a_u)^{-2}$ | 38.08       |
| $(4b_u 7a_g)^{-2}$ | 37.46       |                    |             |

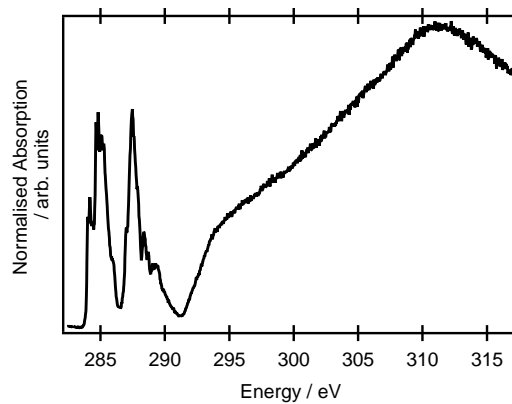

Figure S11 X-ray absorption spectrum (XAS) of butadiene over an extended energy range.

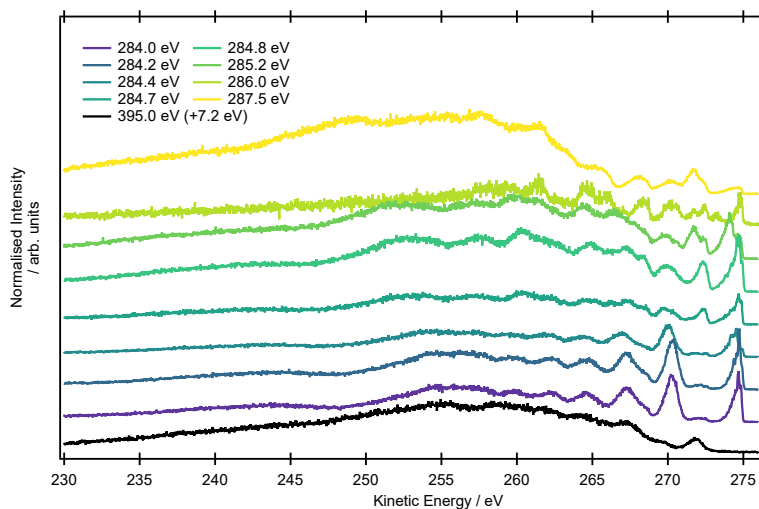

Figure S12 Comparison of the non-resonant Auger spectrum to the resonant Auger spectra at a series of incident photon energies. The spectra have been arbitrarily shifted to match the kinetic energies of the first spectral feature. The spectral intensities have been scaled relative to the intensities in the measured XAS spectrum.



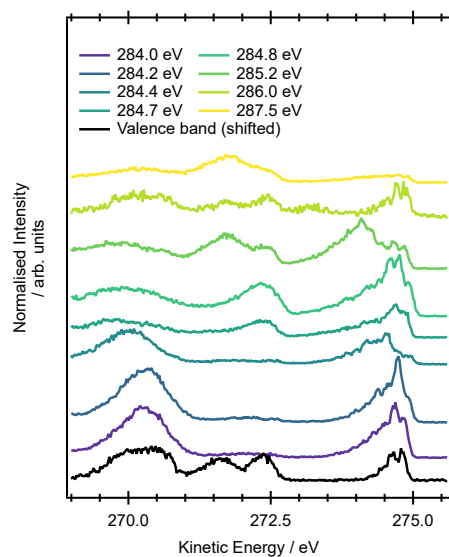

Figure S13 The high kinetic energy region of the resonant Auger spectra of butadiene compared to the valence band photoelectron spectrum that has been arbitrarily shifted. The spectral intensities have been scaled relative to the intensities in the measured XAS spectrum.

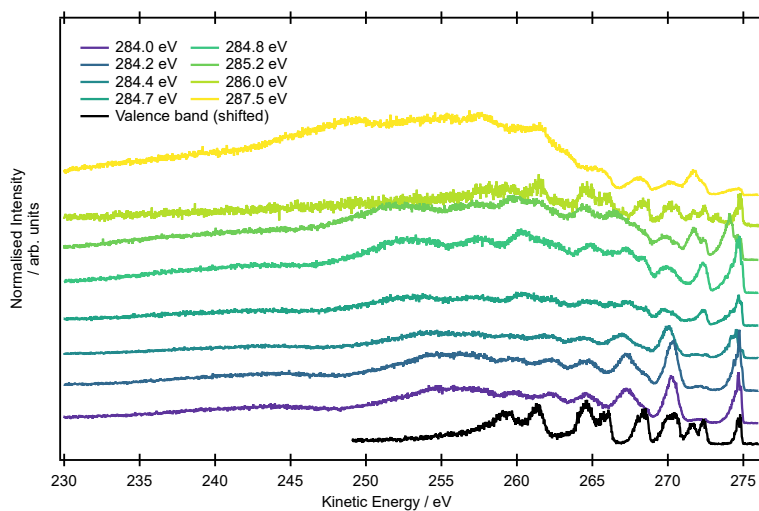

Figure S14 Resonant Auger spectra of butadiene compared to the valence band photoelectron spectrum that has been arbitrarily shifted. The spectral intensities have been scaled relative to the intensities in the measured XAS spectrum.

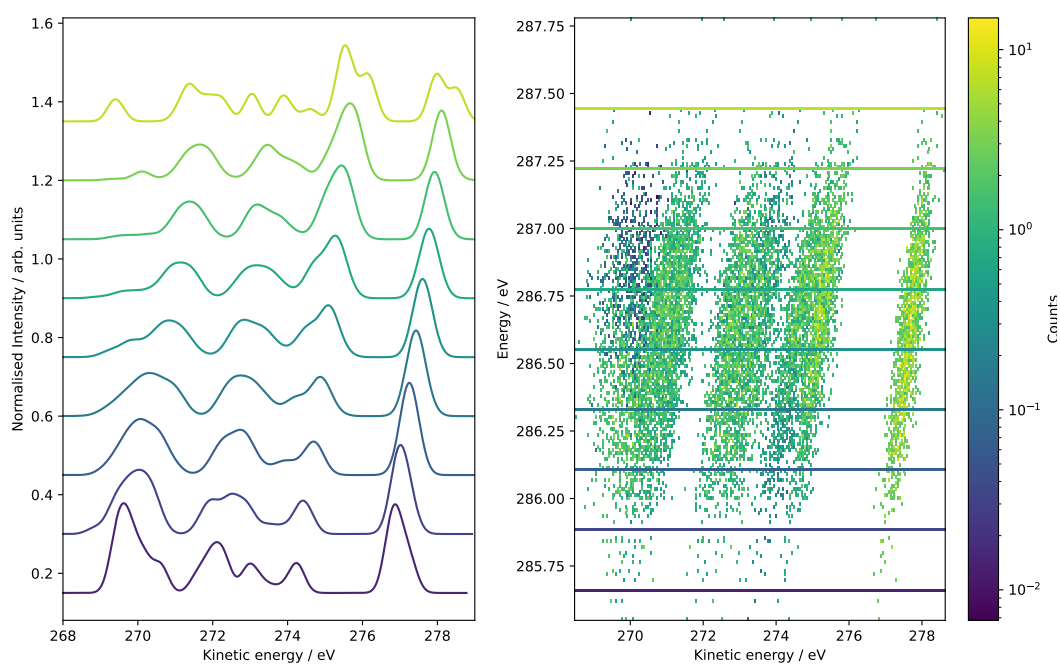

Figure S15 Resonant Auger spectra calculated across the pre-edge region of butadiene in 2D for an ensemble of 400 geometries at the EOM-CCSD/cc-pVDZ + cc-pCVDZ level. Spectra were Gaussian broadened by 0.2 eV.

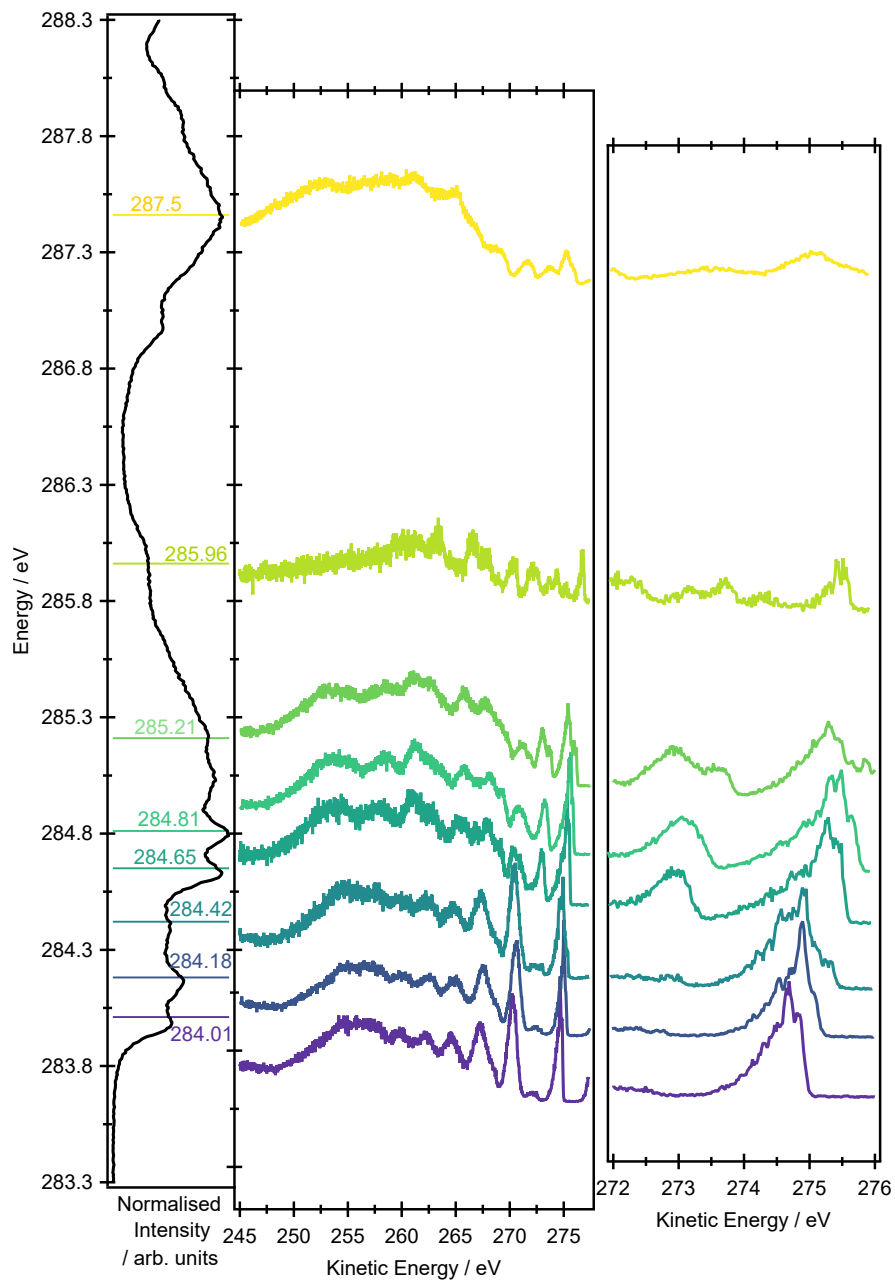

Figure S16 Resonant Auger measurements across the pre-edge region of butadiene recorded with an incident photon bandwidth of  $\sim 65$  meV. The left-most panel is the absorption spectrum where the lines denote the excitation energies used for the Auger measurements. The right-most panel focuses on the band in the resonant Auger measurements which corresponds to the participator decay into the  $\tilde{X} \ ^2B_g$  final state.

## Notes and references

- 1 D. M. P. Holland, M. A. MacDonald, M. A. Hayes, P. Baltzer, B. Wannberg, M. Lundqvist, L. Karlsson and W. von Niessen, *Journal of Physics B: Atomic and Molecular Physics*, 1996, **29**, 3091–3107.
- 2 M. Deleuze and S. Knippenberg, *The Journal of Chemical Physics*, 2006, **125**, 104309.
- 3 N. C. Craig, P. Groner and D. C. McKean, *Journal of Physical Chemistry A*, 2006, **110**, 7461–7469.
- 4 S. Jana and J. M. Herbert, *The Journal of Chemical Physics*, 2023, **158**, 094111.
- 5 J. M. Herbert, Y. Zhu, B. Alam and A. K. Ojha, *Journal of Chemical Theory and Computation*, 2023, **19**, 6745–6760.
